# Supplementary material
Source: ML conference proceedings conference paper supplement (https://aclanthology.org/2021.eacl-main.175)
Supplement: Dataset [file readme.pdf › FinReason/readme.pdf]

# FinReason

FinReason is a financial-domain Chinese corpus regarding extracting the causes of major events in the announcements of listed companies. Each document in this corpus contains one or more structural events, and each event has none, one or more causes in the document. These events are automatically matching to the documents and the causes are manually annotated. In total, there are 3 types of events in FinReason.

*Pledge*: Pledging of shares is that the shareholders of listed companies use their stocks (equity) as collateral to apply for loans from banks or provide a guarantee for loans from third parties. This kind of event implies the funding status of the related companies and investors will take it into accounts when making decisions.

*O&U*: Overweighting\Underweighting of shares refers to the major shareholder's increasing or reducing of their shares over the company. This kind of event indicates the confidence of the major shareholders towards the company and will have an influence on the stock price.

*Lawsuit*: Lawsuit and Arbitration are the legal disputes about the listed company or the big shareholders of the company. This type of event will tremendously impact the stock price of the related companies.

The annotated data are stored in the XML files as in the sample. Each document with annotations has a root node <causality> with document ID as an attribute. The sub-nodes of the root are <content> as the original document text, <event> as the corresponding structured events, and <reason> as the annotated causal text span of each structured event. We also use sub-nodes of <eventN> and <reasonN> to discriminate reasons for each structured event, for example <cause1> for particular event <event1>. Besides, the attribute "mention" in <event> node gives the count of the structurally described events: "0" represents no event, "1" represents the single event and "2" represents multiple events. This is similar for the attributes of <reason> node, where "0" represents no reason found, "1" represents single reason and "2" represents multiple reasons.

Sample<sup>1</sup>:

```
<causality ID="PLEDGE_2168">
  <content>.....2017 年 1 月 13 日，小康控股将其持有的公司 40,000,000 股限售流通股质押给重庆农商行...
  质押期限自 2017 年 1 月 6 日至质押登记解除日为止...公司股东张容于 2016 年 12 月 13 日将其持有的公司
  5,353,400 股限售流通股质押给中信建投证券股份有限公司，用于办理股票质押式回购交易...小康控股本次股
  份质押是为自身融资提供股权质押担保.....
  .....On Jan 13th 2017, Kang Inc. declared its pledge of 40,000,000 shares to CRCB bank since Jan 1st 2016.
  Shareholder Rong Zhang pledged her holdings of 5,353,400 to CITICS Inc. from Dec. 13th 2016 for stock pledged repo
  transactions... Kang's pledge aimed at providing guarantee for self-financing.....</content>
  <event mention="2">
    <event1>{"ORG": "重庆农村行 CRCB bank", "BEG": "2017-01-06", "NUM": "40,000,000", "NAME": "小康控股 Kang
  Inc.
    "}</event1>
    <event2>{"ORG": "中信建投 CITICS Inc.", "BEG": "2016-12-13", "NUM": "5,353,400", "NAME": "张容 Rong Zhang"}
  </event2> </event>
  <reason mention="2">
    <cause1 END="677" START="662">质押是为自身融资提供股权质押担保 aimed at providing guarantee for
    self-financing </cause1>
    <cause2 END="591" START="577">用于办理股票质押式回购交易业务 for stock pledged repo transactions
    </cause2></reason>
</causality>
```

<sup>1</sup> This is a Chinese version dataset and the English translation is for communication convenience.
